# Supplementary material for: Efficacy of single-dose HPV vaccination among young African women
Source: PubMed Central journal article supplement (PMC9172784; doi:10.1056/evidoa2100056), 2022-04-11
Supplement: EVIDoa2100056_Supplement.pdf [file EVIDoa2100056_Supplement.pdf]

## Table of Contents

|                                                                                                                                           |    |
|-------------------------------------------------------------------------------------------------------------------------------------------|----|
| KEN SHE STUDY TEAM .....                                                                                                                  | 3  |
| Table S1: Baseline characteristics of the ITT population .....                                                                            | 4  |
| Table S2: Visit retention - ITT m18 analysis data .....                                                                                   | 5  |
| Table S3: Visit retention - HPV 16/18 mITT m18 analysis data .....                                                                        | 6  |
| Table S4: Visit retention - HPV 16/18/31/33/45/52/58 mITT m18 analysis data .....                                                         | 7  |
| Table S5. Completeness of Endpoint Swab* Collection through Month 18 (HPV 16/18 mITT Cohort).....                                         | 8  |
| Table S6. Number of Endpoint Swabs per Participant through Month 18 (HPV 16/18 mITT Cohort).....                                          | 8  |
| Table S7. Completeness of Endpoint Swab* Collection through Month 18 (HPV 16/18/31/33/45/52/58 mITT Cohort) .....                         | 9  |
| Table S8. Number of Endpoint Swabs per Participant through Month 18 (HPV 16/18/31/33/45/52/58 mITT Cohort) .....                          | 9  |
| Table S9. Incidence of persistent HPV 16/18 including visits beyond Month 18 (Extended Sensitivity Cohort) 10                             |    |
| Table S10. Incidence of persistent HPV 16/18/31/33/45/52/58 including visits beyond Month 18 (Extended Sensitivity Cohort).....           | 11 |
| Table S11. Incidence of persistent HPV 16/18 and Vaccine Efficacy by month 18 using Cervical Swabs Only (mITT Cohort) .....               | 12 |
| Table S12. Incidence of persistent HPV 16/18/31/33/45/52/58 and Vaccine Efficacy by month 18 using Cervical Swabs Only (mITT Cohort)..... | 13 |
| Table S13. Summary of Tested Endpoint Swabs and Swab Collection Types .....                                                               | 14 |
| Table S14. Mean fluorescence intensity (MFI) cut-off values used for Luminex Antibody Assay of Enrollment Serum Specimens.....            | 15 |
| Table S15a. Summary of mITT Endpoint HPV Types by Randomized Group (HPV 16/18 mITT Cohort).....                                           | 16 |
| Table S15b. Summary of mITT Endpoint HPV Types by Randomized Group (HPV 16/18/31/33/45/52/58 mITT Cohort) .....                           | 16 |
| Table S16a. Summary of Follow-up Laboratory Results by Randomized Group (HPV 16/18 mITT Cohort) .....                                     | 17 |
| Table S16b. Summary of Follow-up Laboratory Results by Randomized Group (HPV 16/18/31/33/45/52/58 mITT Cohort) .....                      | 17 |
| Table S17. Incidence of persistent HPV 16/18 and Vaccine Efficacy by Month 18 (ITT).....                                                  | 18 |
| Table S18. Incidence of persistent HPV 16/18/31/33/45/52/58 and Vaccine Efficacy by Month 18 (ITT).....                                   | 19 |
| Table S19. Summary of Participants with only 1 post-Month 3 Swab Resulted for HPV DNA through Month 18 (mITT Cohorts).....                | 20 |
| Table S20: Participants experiencing adverse events (ITT) .....                                                                           | 21 |
| Table S21. Incidence of persistent HPV (Vaccine Types) by Month 18 (HPV type-specific mITT Cohorts) .....                                 | 22 |
| Table S22. Supplementary Table on the Representativeness of Study Participants.....                                                       | 23 |

|                                                                                                                                                                                 |    |
|---------------------------------------------------------------------------------------------------------------------------------------------------------------------------------|----|
| Table S23. Incidence of persistent HPV 16/18 including visits beyond Month 18 (Sensitivity Cohort including participants with HPV antibodies at enrollment) .....               | 24 |
| Table S24. Incidence of persistent HPV 16/18/31/33/45/52/58 including visits beyond Month 18 (Sensitivity Cohort including participants with HPV antibodies at enrollment)..... | 25 |
| Table S25. Exploratory analysis: Incidence of persistent HPV 31/33/45 (HPV 31/33/45 mITT cohort).....                                                                           | 26 |
| Table S26. Exploratory analysis: Incidence of persistent HPV Types (Combined non-Vaccine Types, mITT sensitivity cohort).....                                                   | 27 |
| Table S27: Baseline STI characteristics: modified intention-to-treat (mITT) cohort .....                                                                                        | 28 |

## KEN SHE STUDY TEAM

Listed in alphabetical order by institution.

**Bill and Melinda Gates Foundation** (Peter Dull, Caroline Wendell, Ruha Shadab); **Fred Hutchinson Cancer Research Center** (Elizabeth Brown, Deborah Donnell, Denise Galloway, Jody Carter, Leeya F. Pinder, Marci Wright, Priya R. Prabhu Robin Smith); **KEMRI Kisumu** (Elizabeth A. Bukusi, Maricianah Onono, Annette A. Opondo, Brian Mata, Byron I. Odhiambo, Catherine W. Mwakio, Charles O. Ochulo, Chrispine O. Abuya, Christine A. Olweny, Consolata A. Opondo, Cynthia Akinyi, David E. Muhoma, Debora A. Odhiambo, Dismas O. Congo, Donnavane A. Ondego, Florence A. Ondiek, Fyrose Makori, George O. Omondi, Gilbert C. Mutai, Hellen A. Olweyo, Imelda N. Imali, Imeldah N. Wakhungu, Irene A. Amada, Irine A. Odongo, Janet A. Okeyo, Joan A. Ongere, Job A. Ouma, Joseph O. Ayoo, Judith A. Osiro, Kevin O. Onyango, Kiplagat Kiptoo, Linet A. Okode, Lizzie N. Kabete, Lyna A. Memo, Maqline A. Achola, Maxwell A. Oluoch, Meldah O. Adipo, Mildred A. Owenga, Millicent A. Oronje, Moses O. Siaji, Nibert B. Walusala, Nollyne A. Okuku, Penina N. Amboka, Prudence A. Amolo, Rebecca A. Otieno, Reina Lenturkana, Renna A. Opere, Robai Mituyi, Sarah G. Obaje, Simon M. Muthusi, Thomas O. Odhul, Tobias O. Odwar, Veronica O. Atogo, Walter W. Otieno, Yuashita E. Hussein); **KEMRI Nairobi** (Betty Njoroge, Andrew Mutinda, Ann I. Namulen, Brenda Amollo, Chrispinus Wanyonyi, Edith W. Mwangi, Edna Nyandiga, Epines K. Chavangi, Esther K. Charles, Hellen W. Kimani, Irene Thuo, Jackline Muthoki, Milkah W. Wambui, Moses M. Mutinda, Peter Mogere, Priscillah Wangeci, Purity Kiwinda, Reginah N. Gichuki, Sahara H. Adan, Snaidah Ongachi, Syovata Kimanthi, Ted Opiyo, Umi W. Mugo, Veronica W. Muchoki, Victoria N. Kyengo, Victoria Oluoch, Vincent Juma); **KEMRI Thika** (Nelly Mugo, Anne Akinyi, Barbara Akinyi, Benedict Muchai, Caren Koli, Catherine Kiptinness, Charlene Biwott, Charles Mwangi, David Chege, Dennis Wafula, Diana Rubia, Edith Kimani, Edwin Mugo, Elizabeth Okwaro, Emily Anyango, Erick Koome, Faith Nyantika, Francis Khaemba, Fridah Nkatha, Gladys Namboka, Grace Muguro, Grace Ndung'u, Irene Njeru, Jacinta Nyokabi, Jelioth Muthoni, John Njoroge, Joshua Omari, Judith Achieng, Linet Makena, Lydiah Wambui, Lynda Oluoch, Margaret Mwangi, Margaret Wairima, Mary Kibatha, Mathew Irungu, Matilda Saina, Moses Musau, Nancy Kiarie, Nina Ouko, Peter Mogere, Peter Mwenda, Peterson Mwaniki, Praxides Pessah, Rosemary Ngacha, Sarah Mbaire, Scholastica Wanjiku, Snaidah Ongachi, Solomon Maina, Stephen Gakuo, Victoria Wambui, Vincent Juma, Zachary Gathu); **University of Washington, Mombasa** (R. Scott McClelland, Emmanuel Kabare, Fatma H. Mwidadi, Juma Shafi, Khamis Mwinyikai, Rukiya Hassan, Salwa Mustafa); **University of Washington, Seattle** (Ruanne Barnabas, Elizabeth Brown, Bobbi Nodell, Cara Bayer, Caroline H. Liou, Clare E. Brown, Connie Celum, Daphne Hamilton, Deborah Donnell, Deidra Montoya, Elena A. Rechkina, Elizabeth Harrington, Gui Lui, Hannah Leingang, Harald Haugen, Jared M. Baeten, Jasper Bleijs, Jack Knauer, Jenell C. Stewart, Jennifer Baugh, Jodi Greathouse, John Lin, Justice Quame-Amaglo, Kate B. Heller, Lara Kidoguchi, Meighan Krows, Rachel Johnson, Rachel L. Winer, Stephen L. Cherne, Susan Morrison, Toni Maddox, Torin Schaafsma); **DF/Net Research, Inc., Seattle** (Angela Williams, Bill Larson, Gavin Robertson, Krissa Gunderson, Lisa Ondrejcek, Rheanna Summers, Tadas Lukosevicius)

### **Contributions**

RVB, DD, ERB, NM, and JMB designed the trial. KBH and TTS performed the data analyses. MO, RVB, NM and HL oversaw the operations of the trial. All authors contributed equally to results interpretation. RVB wrote the first draft of the manuscript. All authors contributed equally to the execution of the trial and critically reviewed and approved the finalized manuscript.

**Table S1: Baseline characteristics of the ITT population**

| Characteristic                                 | Category                           | Nonavalent HPV | Bivalent HPV | Meningococcal | All          |
|------------------------------------------------|------------------------------------|----------------|--------------|---------------|--------------|
|                                                |                                    | Total          | 758          | 760           | 757          |
| Age group (years)                              | 15-17                              | 453 (59.8%)    | 424 (55.8%)  | 424 (56.0%)   | 1301 (57.2%) |
|                                                | 18-20                              | 305 (40.2%)    | 336 (44.2%)  | 333 (44.0%)   | 974 (42.8%)  |
| Marital status                                 | Never married                      | 728 (96.0%)    | 713 (93.8%)  | 712 (94.1%)   | 2153 (94.6%) |
|                                                | Married                            | 25 (3.3%)      | 39 (5.1%)    | 32 (4.2%)     | 96 (4.2%)    |
|                                                | Previously Married                 | 4 (0.5%)       | 6 (0.8%)     | 13 (1.7%)     | 23 (1.0%)    |
|                                                | Other                              | 1 (0.1%)       | 2 (0.3%)     | 0 (0.0%)      | 3 (0.1%)     |
| Education (highest level)                      | No schooling                       | 1 (0.1%)       | 3 (0.4%)     | 3 (0.4%)      | 7 (0.3%)     |
|                                                | Primary school, some or complete   | 52 (6.9%)      | 47 (6.2%)    | 61 (8.1%)     | 160 (7.0%)   |
|                                                | Secondary school, some or complete | 553 (73.0%)    | 551 (72.5%)  | 550 (72.7%)   | 1654 (72.7%) |
|                                                | Post-secondary school              | 152 (20.1%)    | 159 (20.9%)  | 143 (18.9%)   | 454 (20.0%)  |
| Earns an income of her own                     | No                                 | 665 (87.7%)    | 653 (85.9%)  | 656 (86.7%)   | 1974 (86.8%) |
|                                                | Yes                                | 93 (12.3%)     | 107 (14.1%)  | 101 (13.3%)   | 301 (13.2%)  |
| Has a current main or steady sexual partner    | No                                 | 209 (27.6%)    | 222 (29.2%)  | 211 (27.9%)   | 642 (28.2%)  |
|                                                | Yes                                | 549 (72.4%)    | 538 (70.8%)  | 546 (72.1%)   | 1633 (71.8%) |
| Age when first had vaginal intercourse (years) | <15                                | 190 (25.1%)    | 180 (23.7%)  | 170 (22.5%)   | 540 (23.7%)  |
|                                                | 15-17                              | 397 (52.4%)    | 415 (54.6%)  | 445 (58.8%)   | 1257 (55.3%) |
|                                                | >=18                               | 148 (19.5%)    | 155 (20.4%)  | 130 (17.2%)   | 433 (19.0%)  |
|                                                | Don't remember                     | 23 (3.0%)      | 10 (1.3%)    | 12 (1.6%)     | 45 (2.0%)    |
| Number of lifetime sexual partners             | 1                                  | 464 (61.2%)    | 484 (63.7%)  | 444 (58.7%)   | 1392 (61.2%) |
|                                                | 2                                  | 195 (25.7%)    | 176 (23.2%)  | 194 (25.6%)   | 565 (24.8%)  |
|                                                | >=3                                | 99 (13.1%)     | 100 (13.2%)  | 119 (15.7%)   | 318 (14.0%)  |
| Condom use with last vaginal sex               | No                                 | 239 (31.5%)    | 244 (32.1%)  | 233 (30.8%)   | 716 (31.5%)  |
|                                                | Yes                                | 358 (47.2%)    | 365 (48.0%)  | 367 (48.5%)   | 1090 (47.9%) |
|                                                | No sex in past year                | 161 (21.2%)    | 151 (19.9%)  | 157 (20.7%)   | 469 (20.6%)  |
| Syphilis                                       | Negative                           | 757 (99.9%)    | 760 (100.0%) | 754 (99.6%)   | 2271 (99.8%) |
|                                                | Positive                           | 1 (0.1%)       | 0            | 1 (0.1%)      | 2 (0.1%)     |
|                                                | Not Done                           | 0              | 0            | 2 (0.3%)      | 2 (0.1%)     |
| C. trachomatis                                 | Negative                           | 665 (87.7%)    | 663 (87.2%)  | 651 (86.0%)   | 1979 (87.0%) |
|                                                | Positive                           | 93 (12.3%)     | 97 (12.8%)   | 106 (14.0%)   | 296 (13.0%)  |
| N. gonorrhoeae                                 | Negative                           | 745 (98.3%)    | 738 (97.1%)  | 741 (97.9%)   | 2224 (97.8%) |
|                                                | Positive                           | 13 (1.7%)      | 22 (2.9%)    | 16 (2.1%)     | 51 (2.2%)    |
| HSV-2                                          | Negative                           | 616 (81.3%)    | 597 (78.6%)  | 584 (77.1%)   | 1797 (79.0%) |
|                                                | Positive                           | 141 (18.6%)    | 162 (21.3%)  | 173 (22.9%)   | 476 (20.9%)  |
|                                                | Indeterminate                      | 1 (0.1%)       | 1 (0.1%)     | 0             | 2 (0.1%)     |
| Bacterial vaginosis*                           | Negative                           | 604 (79.7%)    | 576 (75.8%)  | 587 (77.5%)   | 1767 (77.7%) |
|                                                | Positive                           | 154 (20.3%)    | 183 (24.1%)  | 170 (22.5%)   | 507 (22.3%)  |
|                                                | Not Done                           | 0              | 1 (0.1%)     | 0             | 1 (0.0%)     |
| Trichomonas vaginalis                          | Negative                           | 723 (95.4%)    | 728 (95.8%)  | 722 (95.4%)   | 2173 (95.5%) |
|                                                | Positive                           | 35 (4.6%)      | 32 (4.2%)    | 35 (4.6%)     | 102 (4.5%)   |

\*Nugent scores 7-10 were classified as BV positive and Nugent score 0-6 were classified as BV negative.

**Table S2: Visit retention - ITT m18 analysis data**

|                         |           | Month 3      | Month 6      | Month 9      | Month 12     | Month 15     | Month 18     |
|-------------------------|-----------|--------------|--------------|--------------|--------------|--------------|--------------|
| <b>Randomized Group</b> |           |              |              |              |              |              |              |
| Nonavalent HPV          | Expected  | 758          | 758          | 758          | 758          | 758          | 742          |
|                         | Completed | 710 (93.7%)  | 651 (85.9%)  | 723 (95.4%)  | 642 (84.7%)  | 738 (97.4%)  | 688 (92.7%)  |
|                         | Missed    | 48 (6.3%)    | 107 (14.1%)  | 35 (4.6%)    | 116 (15.3%)  | 20 (2.6%)    | 54 (7.3%)    |
| Bivalent HPV            | Expected  | 760          | 760          | 760          | 760          | 760          | 746          |
|                         | Completed | 712 (93.7%)  | 644 (84.7%)  | 731 (96.2%)  | 662 (87.1%)  | 742 (97.6%)  | 701 (94.0%)  |
|                         | Missed    | 48 (6.3%)    | 116 (15.3%)  | 29 (3.8%)    | 98 (12.9%)   | 18 (2.4%)    | 45 (6.0%)    |
| Meningococcal           | Expected  | 757          | 756          | 756          | 756          | 756          | 742          |
|                         | Completed | 699 (92.3%)  | 637 (84.3%)  | 719 (95.1%)  | 650 (86.0%)  | 735 (97.2%)  | 684 (92.2%)  |
|                         | Missed    | 58 (7.7%)    | 119 (15.7%)  | 37 (4.9%)    | 106 (14.0%)  | 21 (2.8%)    | 58 (7.8%)    |
| All                     | Expected  | 2275         | 2274         | 2274         | 2274         | 2274         | 2230         |
|                         | Completed | 2121 (93.2%) | 1932 (85.0%) | 2173 (95.6%) | 1954 (85.9%) | 2215 (97.4%) | 2073 (93.0%) |
|                         | Missed    | 154 (6.8%)   | 342 (15.0%)  | 101 (4.4%)   | 320 (14.1%)  | 59 (2.6%)    | 157 (7.0%)   |

NOTE: A visit is counted as expected if a participant has completed the visit within the expected window, or once the participant's visit window has closed. A visit is counted as missed only once the last visit window has closed.

**Table S3: Visit retention - HPV 16/18 mITT m18 analysis data**

|                         |           | Month 3       | Month 6      | Month 9      | Month 12     | Month 15     | Month 18     |
|-------------------------|-----------|---------------|--------------|--------------|--------------|--------------|--------------|
| <b>Randomized Group</b> |           |               |              |              |              |              |              |
| Nonavalent HPV          | Expected  | 496           | 496          | 496          | 496          | 496          | 489          |
|                         | Completed | 496 (100.0%)  | 454 (91.5%)  | 481 (97.0%)  | 436 (87.9%)  | 489 (98.6%)  | 460 (94.1%)  |
|                         | Missed    | 0             | 42 (8.5%)    | 15 (3.0%)    | 60 (12.1%)   | 7 (1.4%)     | 29 (5.9%)    |
| Bivalent HPV            | Expected  | 489           | 489          | 489          | 489          | 489          | 486          |
|                         | Completed | 489 (100.0%)  | 437 (89.4%)  | 477 (97.5%)  | 436 (89.2%)  | 480 (98.2%)  | 461 (94.9%)  |
|                         | Missed    | 0             | 52 (10.6%)   | 12 (2.5%)    | 53 (10.8%)   | 9 (1.8%)     | 25 (5.1%)    |
| Meningococcal           | Expected  | 473           | 473          | 473          | 473          | 473          | 468          |
|                         | Completed | 473 (100.0%)  | 422 (89.2%)  | 455 (96.2%)  | 419 (88.6%)  | 464 (98.1%)  | 434 (92.7%)  |
|                         | Missed    | 0             | 51 (10.8%)   | 18 (3.8%)    | 54 (11.4%)   | 9 (1.9%)     | 34 (7.3%)    |
| All                     | Expected  | 1458          | 1458         | 1458         | 1458         | 1458         | 1443         |
|                         | Completed | 1458 (100.0%) | 1313 (90.1%) | 1413 (96.9%) | 1291 (88.5%) | 1433 (98.3%) | 1355 (93.9%) |
|                         | Missed    | 0             | 145 (9.9%)   | 45 (3.1%)    | 167 (11.5%)  | 25 (1.7%)    | 88 (6.1%)    |

NOTE: A visit is counted as expected if a participant has completed the visit within the expected window, or once the visit window has closed. A visit is counted as missed only once the visit window has closed.

**Table S4: Visit retention - HPV 16/18/31/33/45/52/58 mITT m18 analysis data**

|                         |           | Month 3      | Month 6     | Month 9     | Month 12    | Month 15    | Month 18    |
|-------------------------|-----------|--------------|-------------|-------------|-------------|-------------|-------------|
| <b>Randomized Group</b> |           |              |             |             |             |             |             |
| Nonavalent HPV          | Expected  | 325          | 325         | 325         | 325         | 325         | 321         |
|                         | Completed | 325 (100.0%) | 300 (92.3%) | 316 (97.2%) | 291 (89.5%) | 322 (99.1%) | 306 (95.3%) |
|                         | Missed    | 0            | 25 (7.7%)   | 9 (2.8%)    | 34 (10.5%)  | 3 (0.9%)    | 15 (4.7%)   |
| Meningococcal           | Expected  | 290          | 290         | 290         | 290         | 290         | 286         |
|                         | Completed | 290 (100.0%) | 262 (90.3%) | 280 (96.6%) | 255 (87.9%) | 283 (97.6%) | 267 (93.4%) |
|                         | Missed    | 0            | 28 (9.7%)   | 10 (3.4%)   | 35 (12.1%)  | 7 (2.4%)    | 19 (6.6%)   |
| All                     | Expected  | 615          | 615         | 615         | 615         | 615         | 607         |
|                         | Completed | 615 (100.0%) | 562 (91.4%) | 596 (96.9%) | 546 (88.8%) | 605 (98.4%) | 573 (94.4%) |
|                         | Missed    | 0            | 53 (8.6%)   | 19 (3.1%)   | 69 (11.2%)  | 10 (1.6%)   | 34 (5.6%)   |

NOTE: A visit is counted as expected if a participant has completed the visit within the expected window, or once the visit window has closed. A visit is counted as missed only once the visit window has closed.

**Table S5. Completeness of Endpoint Swab\* Collection through Month 18 (HPV 16/18 mITT Cohort)**

| Randomized Group | Swab 1 (Month 6) |                  | Swab 2 (Month 12) |                  | Swab 3 (Month 18) |                  |
|------------------|------------------|------------------|-------------------|------------------|-------------------|------------------|
|                  | Expected (n)**   | Completed, n (%) | Expected (n)**    | Completed, n (%) | Expected (n)**    | Completed, n (%) |
| Nonavalent HPV   | 496              | 496 (100.0%)     | 496               | 485 (97.8%)      | 463               | 434 (93.7%)      |
| Bivalent HPV     | 489              | 489 (100.0%)     | 489               | 479 (98.0%)      | 467               | 445 (95.3%)      |
| Meningococcal    | 473              | 472 (99.8%)      | 473               | 466 (98.5%)      | 445               | 415 (93.3%)      |
| All              | 1458             | 1457 (99.9%)     | 1458              | 1430 (98.1%)     | 1375              | 1294 (94.1%)     |

\*Endpoint swabs defined as post-Month 3 cervical vaginal or self-collected vaginal swabs at least 4 months apart. Three collected endpoint swabs were not resulted for HPV DNA,

\*\*Month 6 and Month 12 swabs are counted as expected if collected, or if the corresponding visit windows have closed. Month 18 swabs are counted as expected if collected or if >8.5 months have passed since the previous swab collection.

**Table S6. Number of Endpoint Swabs per Participant through Month 18 (HPV 16/18 mITT Cohort)**

| Randomized Group | Number of Endpoint Swabs per Participant* |       |    |       |     |       |      |       |       |        |
|------------------|-------------------------------------------|-------|----|-------|-----|-------|------|-------|-------|--------|
|                  | 0                                         |       | 1  |       | 2   |       | 3    |       | Total |        |
|                  | n                                         | Row % | n  | Row % | n   | Row % | n    | Row % | n     | %      |
| Nonavalent HPV   | 0                                         | 0.0%  | 11 | 2.2%  | 51  | 10.3% | 434  | 87.5% | 496   | 34.0%  |
| Bivalent HPV     | 0                                         | 0.0%  | 10 | 2.0%  | 34  | 7.0%  | 445  | 91.0% | 489   | 33.5%  |
| Meningococcal    | 1                                         | 0.2%  | 6  | 1.3%  | 51  | 10.8% | 415  | 87.7% | 473   | 32.4%  |
|                  | 1                                         | 0.1%  | 27 | 1.9%  | 136 | 9.3%  | 1294 | 88.8% | 1458  | 100.0% |

\*Endpoint swabs defined as post-Month 3 cervical vaginal or self-collected vaginal swabs at least 4 months apart. Three collected endpoint swabs were not resulted for HPV DNA.



**Table S7. Completeness of Endpoint Swab\* Collection through Month 18 (HPV 16/18/31/33/45/52/58 mITT Cohort)**

| Randomized Group | Swab 1 (Month 6) |                  | Swab 2 (Month 12) |                  | Swab 3 (Month 18) |                  |
|------------------|------------------|------------------|-------------------|------------------|-------------------|------------------|
|                  | Expected (n)**   | Completed, n (%) | Expected (n)**    | Completed, n (%) | Expected (n)**    | Completed, n (%) |
| Nonavalent HPV   | 325              | 325 (100.0%)     | 325               | 319 (98.2%)      | 309               | 293 (94.8%)      |
| Meningococcal    | 290              | 289 (99.7%)      | 290               | 285 (98.3%)      | 273               | 253 (92.7%)      |
| All              | 615              | 614 (99.8%)      | 615               | 604 (98.2%)      | 582               | 546 (93.8%)      |

\*Endpoint swabs defined as post-Month 3 cervical vaginal or self-collected vaginal swabs at least 4 months apart. Two collected endpoint swabs were not resulted for HPV DNA.

\*\*Month 6 and Month 12 swabs are counted as expected if collected, or if the corresponding visit windows have closed. Month 18 swabs are counted as expected if collected or if >8.5 months have passed since the previous swab collection.

**Table S8. Number of Endpoint Swabs per Participant through Month 18 (HPV 16/18/31/33/45/52/58 mITT Cohort)**

| Randomized Group | Number of Endpoint Swabs per Participant* |       |    |       |    |       |     |       |       |        |
|------------------|-------------------------------------------|-------|----|-------|----|-------|-----|-------|-------|--------|
|                  | 0                                         |       | 1  |       | 2  |       | 3   |       | Total |        |
|                  | n                                         | Row % | n  | Row % | n  | Row % | n   | Row % | n     | %      |
| Nonavalent HPV   | 0                                         | 0.0%  | 6  | 1.8%  | 26 | 8.0%  | 293 | 90.2% | 325   | 52.8%  |
| Meningococcal    | 1                                         | 0.3%  | 4  | 1.4%  | 32 | 11.0% | 253 | 87.2% | 290   | 47.2%  |
|                  | 1                                         | 0.2%  | 10 | 1.6%  | 58 | 9.4%  | 546 | 88.8% | 615   | 100.0% |

\*Endpoint swabs defined as post-Month 3 cervical vaginal or self-collected vaginal swabs at least 4 months apart. Two collected endpoint swabs were not resulted for HPV DNA.

**Table S9. Incidence of persistent HPV 16/18 including visits beyond Month 18 (Extended Sensitivity Cohort)**

| Group         | Enrolled (n) | HPV 16/18 naive (mITT extended sensitivity) (n) | Incident persistent HPV 16/18 (n) | Woman-years of Follow-up** | Incidence of persistent HPV 16/18 per 100 Woman-years | 95% Confidence Interval* |             | Statistical Comparisons***  |                  |
|---------------|--------------|-------------------------------------------------|-----------------------------------|----------------------------|-------------------------------------------------------|--------------------------|-------------|-----------------------------|------------------|
|               |              |                                                 |                                   |                            |                                                       | Lower Bound              | Upper Bound | Comparison                  | Vaccine Efficacy |
| Nonavalent    | 758          | 429                                             | 0                                 | 499.67                     | 0.00                                                  | 0.00                     | 0.74        | Nonavalent v. Meningococcal | 100.0%           |
| Bivalent      | 760          | 404                                             | 0                                 | 470.32                     | 0.00                                                  | 0.00                     | 0.78        | Bivalent v. Meningococcal   | 100.0%           |
| Meningococcal | 757          | 380                                             | 16                                | 410.53                     | 3.90                                                  | 2.23                     | 6.33        |                             |                  |

\*Exact 95% confidence interval for incidence rate computed using the Poisson distribution.

\*\*Follow-up time amongst women HPV 16/18 DNA-negative at month 0, month 3, and month 6, and antibody-negative at month 0.

\*\*\*Vaccine efficacy computed as  $100 \times (1 - \text{Crude Incidence Rate Ratio})$ .

No multiplicity adjustments for the secondary and exploratory end points were defined in our Statistical Analysis Plan. Therefore, only point estimates and 95% confidence intervals are provided. The confidence intervals have not been adjusted for multiple comparisons and should not be used to infer definitive treatment effects.

**Table S10. Incidence of persistent HPV 16/18/31/33/45/52/58 including visits beyond Month 18 (Extended Sensitivity Cohort)**

| Group         | Enrolled (n) | HPV 16/18/31/33/45/52/58 naïve (mITT extended sensitivity) (n) | Incident persistent HPV 16 18 31 33 45 52 58 (n) | Woman-years of Follow-up** | Incidence of persistent HPV 16 18 31 33 45 52 58 per 100 Woman-years | 95% Confidence Interval* |             | Statistical Comparisons***  |                  |                  |
|---------------|--------------|----------------------------------------------------------------|--------------------------------------------------|----------------------------|----------------------------------------------------------------------|--------------------------|-------------|-----------------------------|------------------|------------------|
|               |              |                                                                |                                                  |                            |                                                                      | Lower Bound              | Upper Bound | Comparison                  | Vaccine Efficacy | 95% CI           |
| Nonavalent    | 758          | 264                                                            | 1                                                | 308.72                     | 0.32                                                                 | 0.01                     | 1.81        | Nonavalent v. Meningococcal | 95.02%           | (62.14%, 99.35%) |
| Meningococcal | 757          | 210                                                            | 14                                               | 220.17                     | 6.36                                                                 | 3.48                     | 10.67       |                             |                  |                  |

\*Exact 95% confidence interval for incidence rate computed using the Poisson distribution.

\*\*Follow-up time amongst women HPV 16/18/31/33/45/52/58 DNA-negative at month 0, month 3 and month 6, and antibody-negative at month 0.

\*\*\*Hazard ratios with 95% confidence intervals are estimated using a single Cox proportional hazards regression model with a three-way class variable for vaccine group. The model is stratified by site, with Efron method for handling ties, and vaccine arm was the only covariate. Vaccine efficacy and 95% CI computed from the hazard ratio as  $[100 \times (1 - HR)]$ .

No multiplicity adjustments for the secondary and exploratory end points were defined in our Statistical Analysis Plan. Therefore, only point estimates and 95% confidence intervals are provided. The confidence intervals have not been adjusted for multiple comparisons and should not be used to infer definitive treatment effects.

**Table S11. Incidence of persistent HPV 16/18 and Vaccine Efficacy by month 18 using Cervical Swabs Only (mITT Cohort)**

| Group          | Enrolled (n) | HPV 16/18 naïve (mITT) (n) | Incident persistent HPV 16/18 (n) | Woman-years of Follow-up** | Incidence of persistent HPV 16/18 per 100 Woman-years | 95% Confidence Interval* |             | Statistical Comparisons***  |                  |                  |
|----------------|--------------|----------------------------|-----------------------------------|----------------------------|-------------------------------------------------------|--------------------------|-------------|-----------------------------|------------------|------------------|
|                |              |                            |                                   |                            |                                                       | Lower Bound              | Upper Bound | Comparison                  | Vaccine Efficacy | 95% CI           |
| Nonavalent HPV | 758          | 496                        | 1                                 | 568.96                     | 0.18                                                  | 0.00                     | 0.98        | Nonavalent v. Meningococcal | 97.27%           | (80.01%, 99.63%) |
| Bivalent HPV   | 760          | 489                        | 1                                 | 563.14                     | 0.18                                                  | 0.00                     | 0.99        | Bivalent v. Meningococcal   | 97.26%           | (79.96%, 99.63%) |
| Meningococcal  | 757          | 473                        | 33                                | 504.44                     | 6.54                                                  | 4.50                     | 9.19        |                             |                  |                  |

\*Exact 95% confidence interval for incidence rate computed using the Poisson distribution.";

\*\*Follow-up time amongst women HPV 16/18 DNA-negative at month 0 and month 3, and antibody-negative at month 0.

\*\*\*Hazard ratios with 95% confidence intervals are estimated using a single Cox proportional hazards regression model with a three-way class variable for vaccine arm. The model is stratified by site, with Efron method for handling ties, and vaccine group was the only covariate. Vaccine efficacy and 95% CI computed from the hazard ratio as  $100 \times (1 - HR)$ . No multiplicity adjustments for the secondary and exploratory end points were defined in our Statistical Analysis Plan. Therefore, only point estimates and 95% confidence intervals are provided. The confidence intervals have not been adjusted for multiple comparisons and should not be used to infer definitive treatment effects.

**Table S12. Incidence of persistent HPV 16/18/31/33/45/52/58 and Vaccine Efficacy by month 18 using Cervical Swabs Only (mITT Cohort)**

| Group          | Enrolled (n) | HPV 16/18/31/33/45/52/58 naïve (mITT) (n) | Incident persistent HPV 16/18/31/33/45/52/58 (n) | Woman-years of Follow-up** | Incidence of persistent HPV 16/18/31/33/45/52/58 per 100 Woman-years | 95% Confidence Interval* |             | Statistical Comparisons***  |                  |                  |
|----------------|--------------|-------------------------------------------|--------------------------------------------------|----------------------------|----------------------------------------------------------------------|--------------------------|-------------|-----------------------------|------------------|------------------|
|                |              |                                           |                                                  |                            |                                                                      | Lower Bound              | Upper Bound | Comparison                  | Vaccine Efficacy | 95% CI           |
| Nonavalent HPV | 758          | 325                                       | 3                                                | 370.47                     | 0.81                                                                 | 0.17                     | 2.37        | Nonavalent v. Meningococcal | 91.42%           | (71.78%, 97.39%) |
| Meningococcal  | 757          | 290                                       | 28                                               | 292.49                     | 9.57                                                                 | 6.36                     | 13.84       |                             |                  |                  |

\*Exact 95% confidence interval for incidence rate computed using the Poisson distribution.

\*\*Follow-up time amongst women HPV 16/18/31/33/45/52/58 DNA-negative at month 0 and month 3, and antibody-negative at month 0.

\*\*\*Hazard ratios with 95% confidence intervals are estimated using a single Cox proportional hazards regression model with a three-way class variable for vaccine group. The model is stratified by site, with Efron method for handling ties, and vaccine group was the only covariate. Vaccine efficacy and 95% CI computed from the hazard ratio as  $[100 \times (1 - HR)]$ .

No multiplicity adjustments for the secondary and exploratory end points were defined in our Statistical Analysis Plan. Therefore, only point estimates and 95% confidence intervals are provided. The confidence intervals have not been adjusted for multiple comparisons and should not be used to infer definitive treatment effects.

**Table S13. Summary of Tested Endpoint Swabs and Swab Collection Types**

| <b>Analysis Cohort</b>        | <b>Total<br/>Endpoint<br/>Swabs (n)</b> | <b>Cervical<br/>Swabs (n)</b> | <b>%</b> | <b>Self-<br/>Collected<br/>Swabs (n)</b> | <b>%</b> |
|-------------------------------|-----------------------------------------|-------------------------------|----------|------------------------------------------|----------|
| ITT                           | 6402                                    | 6042                          | 94.38%   | 360                                      | 5.62%    |
| HPV 16/18 mITT                | 4178                                    | 3982                          | 95.31%   | 196                                      | 4.69%    |
| HPV 16/18/31/33/45/52/58 mITT | 1762                                    | 1689                          | 95.86%   | 73                                       | 4.14%    |

NOTE: Endpoint swabs defined as post-Month 3 cervical or self-collected vaginal swabs at least 4 months apart.

**Table S14. Mean fluorescence intensity (MFI) cut-off values used for Luminex Antibody Assay of Enrollment Serum Specimens**

|        | <b>MFI cut-off Values*</b>             |                               |
|--------|----------------------------------------|-------------------------------|
|        | <b>Luminex HPV Antibody Assay Date</b> |                               |
|        | <b>July 2019-<br/>January 2021</b>     | <b>Feb 2021-July<br/>2021</b> |
| HPV 16 | 1500                                   | 1000                          |
| HPV 18 | 1000                                   | 500                           |
| HPV 31 | 1500                                   | 1000                          |
| HPV 33 | 1500                                   | 500                           |
| HPV 45 | 1500                                   | 500                           |
| HPV 52 | 2500                                   | 1000                          |
| HPV 58 | 1500                                   | 1000                          |

\*Enrollment serum specimens with MFI values greater than or equal the pre-defined cut-offs above were considered positive antibody results.

**Table S15a. Summary of mITT Endpoint HPV Types by Randomized Group (HPV 16/18 mITT Cohort)**

| Randomized Group |                |              |               |       |
|------------------|----------------|--------------|---------------|-------|
|                  | Nonavalent HPV | Bivalent HPV | Meningococcal | Total |
| HPV Type*        | n              | n            | n             | n     |
| 16               | 1              | 1            | 28            | 30    |
| 16,18            | 0              | 0            | 1             | 1     |
| 18               | 0              | 0            | 7             | 7     |
| Total            | 1              | 1            | 36            | 38    |

\*Vaccine-specific HPV type(s) detected at two consecutive visits at least four months apart. If two or more HPV types are listed, both/all types were detected at the consecutive visits.

**Table S15b. Summary of mITT Endpoint HPV Types by Randomized Group (HPV 16/18/31/33/45/52/58 mITT Cohort)**

| Randomized Group |                |              |               |       |
|------------------|----------------|--------------|---------------|-------|
|                  | Nonavalent HPV | Bivalent HPV | Meningococcal | Total |
| HPV Type*        | n              | n            | n             | n     |
| 16               | 1              | 0            | 12            | 13    |
| 16,52            | 0              | 0            | 1             | 1     |
| 16,52,58         | 0              | 0            | 1             | 1     |
| 18               | 0              | 0            | 4             | 4     |
| 31               | 1              | 5            | 1             | 7     |
| 31,58            | 0              | 1            | 0             | 1     |
| 33               | 0              | 1            | 1             | 2     |
| 45               | 0              | 2            | 1             | 3     |
| 45,52            | 0              | 0            | 1             | 1     |
| 52               | 0              | 9            | 6             | 15    |
| 58               | 2              | 11           | 1             | 14    |
| Total            | 4              | 29           | 29            | 62    |

\*Vaccine-specific HPV type(s) detected at two consecutive visits at least four months apart. If two or more HPV types are listed, both/all types were detected at the consecutive visits.



**Table S16a. Summary of Follow-up Laboratory Results by Randomized Group (HPV 16/18 mITT Cohort)**

| Randomized Group | Enrolled (n) | C. trachomatis                           |                                                                       |       | N. gonorrhoeae                           |                                                                       |      |
|------------------|--------------|------------------------------------------|-----------------------------------------------------------------------|-------|------------------------------------------|-----------------------------------------------------------------------|------|
|                  |              | Positive test results for chlamydia (n)* | Participants with one or more positive test results for chlamydia (n) | %     | Positive test results for gonorrhea (n)* | Participants with one or more positive test results for gonorrhea (n) | %    |
| Nonavalent HPV   | 496          | 121                                      | 99                                                                    | 20.0% | 43                                       | 37                                                                    | 7.5% |
| Bivalent HPV     | 489          | 131                                      | 113                                                                   | 23.1% | 37                                       | 33                                                                    | 6.7% |
| Meningococcal    | 473          | 107                                      | 89                                                                    | 18.8% | 34                                       | 31                                                                    | 6.6% |
| All              | 1458         | 359                                      | 301                                                                   | 20.6% | 114                                      | 101                                                                   | 6.9% |

\*Includes testing at six monthly follow-up visits completed within visit window with non-missing HPV DNA swabs.

**Table S16b. Summary of Follow-up Laboratory Results by Randomized Group (HPV 16/18/31/33/45/52/58 mITT Cohort)**

| Randomized Group | Enrolled (n) | C. trachomatis                           |                                                                       |       | N. gonorrhoeae                           |                                                                       |      |
|------------------|--------------|------------------------------------------|-----------------------------------------------------------------------|-------|------------------------------------------|-----------------------------------------------------------------------|------|
|                  |              | Positive test results for chlamydia (n)* | Participants with one or more positive test results for chlamydia (n) | %     | Positive test results for gonorrhea (n)* | Participants with one or more positive test results for gonorrhea (n) | %    |
| Nonavalent HPV   | 325          | 88                                       | 73                                                                    | 22.5% | 26                                       | 23                                                                    | 7.1% |
| Meningococcal    | 290          | 58                                       | 49                                                                    | 16.9% | 17                                       | 16                                                                    | 5.5% |
| All              | 615          | 146                                      | 122                                                                   | 19.8% | 43                                       | 39                                                                    | 6.3% |

\*Includes testing at six monthly follow-up visits completed within visit window with non-missing HPV DNA swabs.

**Table S17. Incidence of persistent HPV 16/18 and Vaccine Efficacy by Month 18 (ITT)**

| Arm           | Enrolled (n) | Incident persistent HPV 16/18 (n) | Woman-years of Follow-up** | Incidence of persistent HPV 16/18 per 100 Woman-years | 95% Confidence Interval* |             | Comparison                  | Statistical Comparisons*** |                  |
|---------------|--------------|-----------------------------------|----------------------------|-------------------------------------------------------|--------------------------|-------------|-----------------------------|----------------------------|------------------|
|               |              |                                   |                            |                                                       | Lower Bound              | Upper Bound |                             | Vaccine Efficacy           | 95% CI           |
| Nonavalent    | 758          | 38                                | 1061.00                    | 3.58                                                  | 2.53                     | 4.92        | Nonavalent v. Meningococcal | 62.32%                     | (45.13%, 74.12%) |
| Bivalent      | 760          | 34                                | 1067.75                    | 3.18                                                  | 2.21                     | 4.45        | Bivalent v. Meningococcal   | 66.55%                     | (50.54%, 77.38%) |
| Meningococcal | 757          | 96                                | 994.90                     | 9.65                                                  | 7.82                     | 11.78       |                             |                            |                  |

\*Exact 95% confidence interval for incidence rate computed using the Poisson distribution.

\*\*Follow-up time amongst randomized women.

\*\*\*Hazard ratios with 95% confidence intervals are estimated using a single Cox proportional hazards regression model with a three-way class variable for vaccine arm. The model is stratified by site, with Efron method for handling ties, and vaccine arm was the only covariate. Vaccine efficacy and 95% CI computed from the hazard ratio as 100\*(1-HR).

No multiplicity adjustments for the secondary and exploratory end points were defined in our Statistical Analysis Plan. Therefore, only point estimates and 95% confidence intervals are provided. The confidence intervals have not been adjusted for multiple comparisons and should not be used to infer definitive treatment effects.

**Table S18. Incidence of persistent HPV 16/18/31/33/45/52/58 and Vaccine Efficacy by Month 18 (ITT)**

| Arm           | Enrolled (n) | Incident persistent HPV 16/18/31/33/45/52/58 (n) | Woman-years of Follow-up** | Incidence of persistent HPV 16/18/31/33/45/52/58 per 100 Woman-years | 95% Confidence Interval* |             | Comparison                  | Statistical Comparisons*** |                  |
|---------------|--------------|--------------------------------------------------|----------------------------|----------------------------------------------------------------------|--------------------------|-------------|-----------------------------|----------------------------|------------------|
|               |              |                                                  |                            |                                                                      | Lower Bound              | Upper Bound |                             | Vaccine Efficacy           | 95% CI           |
| Nonavalent    | 758          | 98                                               | 1002.25                    | 9.78                                                                 | 7.94                     | 11.92       | Nonavalent v. Meningococcal | 51.86%                     | (38.50%, 62.31%) |
| Bivalent      | 760          | 168                                              | 923.00                     | 18.20                                                                | 15.55                    | 21.17       |                             |                            |                  |
| Meningococcal | 757          | 186                                              | 902.34                     | 20.61                                                                | 17.76                    | 23.80       |                             |                            |                  |

\*Exact 95% confidence interval for incidence rate computed using the Poisson distribution.

\*\*Follow-up time amongst randomized women.

\*\*\*Hazard ratios with 95% confidence intervals are estimated using a single Cox proportional hazards regression model with a three-way class variable for vaccine arm. The model is stratified by site, with Efron method for handling ties, and vaccine arm was the only covariate. Vaccine efficacy and 95% CI computed from the hazard ratio as  $[100*(1-HR)]$ .

No multiplicity adjustments for the secondary and exploratory end points were defined in our Statistical Analysis Plan. Therefore, only point estimates and 95% confidence intervals are provided. The confidence intervals have not been adjusted for multiple comparisons and should not be used to infer definitive treatment effects.

**Table S19. Summary of Participants with only 1 post-Month 3 Swab Resulted for HPV DNA through Month 18 (mITT Cohorts)**

| <b>mITT Cohort</b>       | <b>N</b> | <b>Only 1 post-month 3 Swab with HPV DNA Results (n)</b> | <b>Positive (n)*</b> | <b>%</b> |
|--------------------------|----------|----------------------------------------------------------|----------------------|----------|
| HPV 16/18                | 1458     | 26                                                       | 0                    | 0.0%     |
| HPV 16/18/31/33/45/52/58 | 615      | 10                                                       | 0                    | 0.0%     |

\*Positive result for respective HPV types (for HPV 16/18 in the HPV 16/18 cohort, or HPV 16/18/31/33/45/52/58 in the HPV 16/18/31/33/45/52/58 cohort).

**Table S20: Participants experiencing adverse events (ITT)**

|                                   | Randomized Arm |              |               |            | P-value* |
|-----------------------------------|----------------|--------------|---------------|------------|----------|
|                                   | Nonavalent HPV | Bivalent HPV | Meningococcal | All        |          |
| Enrolled, n                       | 758            | 760          | 757           | 2275       |          |
| Any SAE, n(%)                     | 34 (4.5%)      | 39 (5.1%)    | 39 (5.2%)     | 112 (4.9%) | 0.8053   |
| Any pregnancy related, n (%)      | 24 (3.2%)      | 19 (2.5%)    | 14 (1.8%)     | 57 (2.5%)  | 0.2744   |
| Any infection/inflammation, n (%) | 9 (1.2%)       | 16 (2.1%)    | 21 (2.8%)     | 46 (2.0%)  | 0.0775   |
| Any injury, n (%)                 | 0 (0.0%)       | 3 (0.4%)     | 4 (0.5%)      | 7 (0.3%)   | 0.7524   |
| Any mental health, n (%)          | 2 (0.3%)       | 1 (0.1%)     | 2 (0.3%)      | 5 (0.2%)   | 0.1253   |

\*P-value computed using Fisher's exact test.

NOTE: Participants may have more than one event across, but not within, event type categories. SAE: Serious adverse event

**Table S21. Incidence of persistent HPV (Vaccine Types) by Month 18 (HPV type-specific mITT Cohorts)**

| HPV Type | Arm           | Enrolled (n) | HPV type-naive (mITT) (n) | Incident persistent HPV (n) | Woman-years of Follow-up** | Incidence of persistent HPV per 100 Woman-years | 95% Confidence Interval* |             |
|----------|---------------|--------------|---------------------------|-----------------------------|----------------------------|-------------------------------------------------|--------------------------|-------------|
|          |               |              |                           |                             |                            |                                                 | Lower Bound              | Upper Bound |
| 16       | Nonavalent    | 758          | 521                       | 1                           | 626.53                     | 0.16                                            | 0.00                     | 0.89        |
|          | Bivalent      | 760          | 528                       | 1                           | 636.24                     | 0.16                                            | 0.00                     | 0.88        |
|          | Meningococcal | 757          | 502                       | 32                          | 565.89                     | 5.65                                            | 3.87                     | 7.98        |
|          | All           | 2275         | 1551                      | 34                          | 1828.66                    | 1.86                                            | 1.29                     | 2.60        |
| 18       | Nonavalent    | 758          | 652                       | 0                           | 785.97                     | 0.00                                            | 0.00                     | 0.47        |
|          | Bivalent      | 760          | 634                       | 0                           | 763.38                     | 0.00                                            | 0.00                     | 0.48        |
|          | Meningococcal | 757          | 622                       | 12                          | 732.67                     | 1.64                                            | 0.85                     | 2.86        |
|          | All           | 2275         | 1908                      | 12                          | 2282.02                    | 0.53                                            | 0.27                     | 0.92        |
| 31       | Nonavalent    | 758          | 622                       | 1                           | 748.62                     | 0.13                                            | 0.00                     | 0.74        |
|          | Bivalent      | 760          | 619                       | 12                          | 734.21                     | 1.63                                            | 0.85                     | 2.86        |
|          | Meningococcal | 757          | 595                       | 5                           | 704.36                     | 0.71                                            | 0.23                     | 1.66        |
|          | All           | 2275         | 1836                      | 18                          | 2187.19                    | 0.82                                            | 0.49                     | 1.30        |
| 33       | Nonavalent    | 758          | 695                       | 0                           | 838.96                     | 0.00                                            | 0.00                     | 0.44        |
|          | Bivalent      | 760          | 690                       | 3                           | 829.78                     | 0.36                                            | 0.08                     | 1.06        |
|          | Meningococcal | 757          | 679                       | 3                           | 809.96                     | 0.37                                            | 0.08                     | 1.08        |
|          | All           | 2275         | 2064                      | 6                           | 2478.70                    | 0.24                                            | 0.09                     | 0.53        |
| 45       | Nonavalent    | 758          | 605                       | 2                           | 727.83                     | 0.27                                            | 0.03                     | 0.99        |
|          | Bivalent      | 760          | 599                       | 9                           | 711.46                     | 1.26                                            | 0.58                     | 2.40        |
|          | Meningococcal | 757          | 596                       | 4                           | 703.36                     | 0.57                                            | 0.16                     | 1.46        |
|          | All           | 2275         | 1800                      | 15                          | 2142.65                    | 0.70                                            | 0.39                     | 1.16        |
| 52       | Nonavalent    | 758          | 590                       | 1                           | 710.76                     | 0.14                                            | 0.00                     | 0.78        |
|          | Bivalent      | 760          | 586                       | 22                          | 676.16                     | 3.25                                            | 2.04                     | 4.93        |
|          | Meningococcal | 757          | 557                       | 26                          | 643.58                     | 4.04                                            | 2.64                     | 5.92        |
|          | All           | 2275         | 1733                      | 49                          | 2030.51                    | 2.41                                            | 1.79                     | 3.19        |
| 58       | Nonavalent    | 758          | 573                       | 5                           | 689.53                     | 0.73                                            | 0.24                     | 1.69        |
|          | Bivalent      | 760          | 568                       | 24                          | 659.18                     | 3.64                                            | 2.33                     | 5.42        |
|          | Meningococcal | 757          | 563                       | 12                          | 657.03                     | 1.83                                            | 0.94                     | 3.19        |
|          | All           | 2275         | 1704                      | 41                          | 2005.74                    | 2.04                                            | 1.47                     | 2.77        |

\*Exact 95% confidence interval for incidence rate computed using the Poisson distribution.

\*\*Follow-up time amongst women HPV-type DNA negative at month 0 and month 3 and HPV-type antibody negative at month 0

**Table S22. Supplementary Table on the Representativeness of Study Participants**

| Category                                 | HPV                                                                                                                                                                                                                                                                                                                                                                                                                                                                                                                                                                                                                                                                                                                                                                                                                                                                                                                                                                                         |
|------------------------------------------|---------------------------------------------------------------------------------------------------------------------------------------------------------------------------------------------------------------------------------------------------------------------------------------------------------------------------------------------------------------------------------------------------------------------------------------------------------------------------------------------------------------------------------------------------------------------------------------------------------------------------------------------------------------------------------------------------------------------------------------------------------------------------------------------------------------------------------------------------------------------------------------------------------------------------------------------------------------------------------------------|
| Condition under investigation            | Persistent infection with human papillomavirus (HPV). While most of these infections resolve without intervention, some infections persist and progress to dysplastic lesion. Thus, persistent HPV infection is used as a surrogate marker for precancerous lesions.                                                                                                                                                                                                                                                                                                                                                                                                                                                                                                                                                                                                                                                                                                                        |
| Special considerations related to:       |                                                                                                                                                                                                                                                                                                                                                                                                                                                                                                                                                                                                                                                                                                                                                                                                                                                                                                                                                                                             |
| Sex and gender                           | Persistent cervical HPV infections occur in females. The study was limited to participants with female sex.                                                                                                                                                                                                                                                                                                                                                                                                                                                                                                                                                                                                                                                                                                                                                                                                                                                                                 |
| Age                                      | HPV prevalence increases with age after sexual debut. In an HPV prevalence study in Kenya, HPV prevalence was 21.3% among 498 women age 18-74 years, with HPV prevalence decreasing with age. HPV prevalence was 28% among women younger than 30 years.^                                                                                                                                                                                                                                                                                                                                                                                                                                                                                                                                                                                                                                                                                                                                    |
| Race or ethnic group                     | Cervical cancer affects Black persons disproportionately in South Africa.*                                                                                                                                                                                                                                                                                                                                                                                                                                                                                                                                                                                                                                                                                                                                                                                                                                                                                                                  |
| Geography                                | There are marked disparities in cervical cancer incidence globally. Almost 90% of the more than 600,000 new cervical cancer cases and 340,000 cervical cancer deaths in 2020 occurred in low- and middle-income countries (LMICs).                                                                                                                                                                                                                                                                                                                                                                                                                                                                                                                                                                                                                                                                                                                                                          |
| Other considerations                     | Trial eligibility criteria included one or more lifetime sexual partners.                                                                                                                                                                                                                                                                                                                                                                                                                                                                                                                                                                                                                                                                                                                                                                                                                                                                                                                   |
| Overall representativeness of this trial | The study did not enroll participant who were not sexually active and thus are participants do not represent the general population of 15–20-year-old adolescents and young women in Kenya. The participants in the clinical trial demonstrated the expected prevalence of HPV among young women in Kenya after sexual debut (29% in the clinical trial compared with 28% in a prevalence study in Kenya). Biological sex was reported by the participants prior to enrollment as enrollment procedures included cervical swabs. The prevalence of HPV among young women seen in this study is comparable to HPV prevalence in the United States: HPV prevalence was 24.5% (95% CI, 19.6%-30.5%) among females aged 14 to 19 years in a US national survey. All participants in the study were Black African, as is appropriate for the setting of a clinical trial in Kenya. The clinical trial population is comparable with sexually active 15–20-year-olds in Kenya and other settings. |

^Ngugi C.W.1, Schmidt D, Wanyoro RK, Boga H, Wanzala P5, Muigai A.W.T, Mbithi J.N, von Knebel, Doeberitz M, Reuschenbach M. Prevalence of Human Papillomavirus infection by age and cervical cytology in Thika, Kenya. *Afr J Health Sci.* 2011; 19:52-62. \*Baillie RS, Selvey CE, Bourne D, Bradshaw D. Trends in cervical cancer mortality in South Africa. *Int J Epidemiol.* 1996 Jun;25(3):488-93. doi: 10.1093/ije/25.3.488. PMID: 8671548. \*Dunne EF, Unger ER, Sternberg M, et al. Prevalence of HPV Infection Among Females in the United States. *JAMA.* 2007;297(8):813–819. doi:10.1001/jama.297.8.813

**Table S23. Incidence of persistent HPV 16/18 including visits beyond Month 18 (Sensitivity Cohort including participants with HPV antibodies at enrollment)**

| Arm           | Enrolled (n) | HPV 16/18 naïve at baseline (mITT sensitivity) (n) | Incident persistent HPV 16/18 (n) | Woman-years of Follow-up** | Incidence of persistent HPV 16/18 per 100 Woman-years | 95% Confidence Interval* |             | Statistical Comparisons***  |                  |                  |
|---------------|--------------|----------------------------------------------------|-----------------------------------|----------------------------|-------------------------------------------------------|--------------------------|-------------|-----------------------------|------------------|------------------|
|               |              |                                                    |                                   |                            |                                                       | Lower Bound              | Upper Bound | Comparison                  | Vaccine Efficacy | 95% CI           |
| Nonavalent    | 758          | 569                                                | 1                                 | 798.26                     | 0.13                                                  | 0.00                     | 0.70        | Nonavalent v. Meningococcal | 98.15%           | (86.63%, 99.74%) |
| Bivalent      | 760          | 561                                                | 3                                 | 792.99                     | 0.38                                                  | 0.08                     | 1.11        | Bivalent v. Meningococcal   | 94.43%           | (82.12%, 98.27%) |
| Meningococcal | 757          | 543                                                | 48                                | 694.08                     | 6.92                                                  | 5.10                     | 9.17        |                             |                  |                  |

\*Exact 95% confidence interval for incidence rate computed using the Poisson distribution.

\*\*Follow-up time amongst women HPV 16/18 DNA-naïve at month 0 and month 3 (antibody results not used).

\*\*\*Hazard ratios with 95% confidence intervals are estimated using a single Cox proportional hazards regression model with a three-way class variable for vaccine arm. The model is stratified by site, with Efron method for handling ties, and vaccine arm was the only covariate. Vaccine efficacy and 95% CI computed from the hazard ratio as  $100 \times (1 - HR)$ .

No multiplicity adjustments for the secondary and exploratory end points were defined in our Statistical Analysis Plan. Therefore, only point estimates and 95% confidence intervals are provided. The confidence intervals have not been adjusted for multiple comparisons and should not be used to infer definitive treatment effects.



**Table S24. Incidence of persistent HPV 16/18/31/33/45/52/58 including visits beyond Month 18 (Sensitivity Cohort including participants with HPV antibodies at enrollment)**

| Arm           | Enrolled (n) | HPV 16/18/31/33/45/52/58 naïve at baseline (mITT sensitivity) (n) | Incident persistent HPV 16/18/31/33/45/52/58 (n) | Woman-years of Follow-up** | Incidence of persistent HPV 16/18/31/33/45/52/58 per 100 Woman-years | 95% Confidence Interval* |             | Comparison                  | Statistical Comparisons*** |                  |
|---------------|--------------|-------------------------------------------------------------------|--------------------------------------------------|----------------------------|----------------------------------------------------------------------|--------------------------|-------------|-----------------------------|----------------------------|------------------|
|               |              |                                                                   |                                                  |                            |                                                                      | Lower Bound              | Upper Bound |                             | Vaccine Efficacy           | 95% CI           |
| Nonavalent    | 758          | 437                                                               | 7                                                | 601.86                     | 1.16                                                                 | 0.47                     | 2.40        | Nonavalent v. Meningococcal | 89.28%                     | (76.39%, 95.13%) |
| Meningococcal | 757          | 392                                                               | 52                                               | 474.81                     | 10.95                                                                | 8.18                     | 14.36       |                             |                            |                  |

\*Exact 95% confidence interval for incidence rate computed using the Poisson distribution.

\*\*Follow-up time amongst women HPV 16/18/31/33/45/52/58 DNA-naïve at month 0 and month 3 (antibody results not used).

\*\*\*Hazard ratios with 95% confidence intervals are estimated using a single Cox proportional hazards regression model with a three-way class variable for vaccine arm. The model is stratified by site, with Efron method for handling ties, and vaccine arm was the only covariate. Vaccine efficacy and 95% CI computed from the hazard ratio as  $[100*(1-HR)]$ .

No multiplicity adjustments for the secondary and exploratory end points were defined in our Statistical Analysis Plan. Therefore, only point estimates and 95% confidence intervals are provided. The confidence intervals have not been adjusted for multiple comparisons and should not be used to infer definitive treatment effects.

**Table S25. Exploratory analysis: Incidence of persistent HPV 31/33/45 (HPV 31/33/45 mITT cohort)**

| Arm           | Enrolled (n) | HPV 31/33/45 naive (mITT) (n) | Incident persistent HPV 31/33/45 (n) | Woman-years of Follow-up** | Incidence of persistent HPV 31/33/45 per 100 Woman-years | 95% Confidence Interval* |             | Comparison                  | Statistical Comparisons*** |                   |
|---------------|--------------|-------------------------------|--------------------------------------|----------------------------|----------------------------------------------------------|--------------------------|-------------|-----------------------------|----------------------------|-------------------|
|               |              |                               |                                      |                            |                                                          | Lower Bound              | Upper Bound |                             | Vaccine Efficacy           | 95% CI            |
| Nonavalent    | 758          | 530                           | 3                                    | 636.21                     | 0.47                                                     | 0.10                     | 1.38        | Nonavalent v. Meningococcal | 69.31%                     | (-13.33%, 91.69%) |
| Bivalent      | 760          | 516                           | 21                                   | 600.58                     | 3.50                                                     | 2.16                     | 5.35        | Bivalent v. Meningococcal   | -129.7%                    | (-401.7%, -5.20%) |
| Meningococcal | 757          | 506                           | 9                                    | 586.36                     | 1.53                                                     | 0.70                     | 2.91        |                             |                            |                   |

\*Exact 95% confidence interval for incidence rate computed using the Poisson distribution.

\*\*Follow-up time amongst women HPV 31/33/45 DNA-naïve at month 0 and month 3, and antibody-negative at month 0.

\*\*\*Hazard ratios with 95% confidence intervals are estimated using a single Cox proportional hazards regression model with a three-way class variable for vaccine arm. The model is stratified by site, with Efron method for handling ties, and vaccine arm was the only covariate. Vaccine efficacy and 95% CI computed from the hazard ratio as  $[100 \times (1 - HR)]$ .

No multiplicity adjustments for the secondary and exploratory end points were defined in our Statistical Analysis Plan. Therefore, only point estimates and 95% confidence intervals are provided. The confidence intervals have not been adjusted for multiple comparisons and should not be used to infer definitive treatment effects.

**Table S26. Exploratory analysis: Incidence of persistent HPV Types (Combined non-Vaccine Types, mITT sensitivity cohort)**

| Arm           | Enrolled (n) | HPV non-Vaccine Type-naïve (mITT) (n) | Incident persistent HPV (n) | Woman-years of Follow-up** | Incidence of persistent HPV per 100 Woman-years | 95% Confidence Interval* |             |
|---------------|--------------|---------------------------------------|-----------------------------|----------------------------|-------------------------------------------------|--------------------------|-------------|
|               |              |                                       |                             |                            |                                                 | Lower Bound              | Upper Bound |
| Nonavalent    | 758          | 247                                   | 53                          | 238.90                     | 22.19                                           | 16.62                    | 29.02       |
| Bivalent      | 760          | 241                                   | 55                          | 224.40                     | 24.51                                           | 18.46                    | 31.90       |
| Meningococcal | 757          | 250                                   | 53                          | 234.08                     | 22.64                                           | 16.96                    | 29.62       |
| All           | 2275         | 738                                   | 161                         | 697.38                     | 23.09                                           | 19.66                    | 26.94       |

\*Exact 95% confidence interval for incidence rate computed using the Poisson distribution.

\*\*Follow-up time amongst women non-vaccine HPV-type DNA negative at month 0 and month 3 (women are excluded if HPV DNA positive at month 0 or month 3 for any of HPV 26/35/39/40/42/43/44/51/53/54/56/59/60/61/66/68/70/73/82)

**Table S27: Baseline STI characteristics: modified intention-to-treat (mITT) cohort**

|                              |               | HPV 16/18 mITT |              |               | HPV 16/18/31/33/45/52/58 mITT |               |
|------------------------------|---------------|----------------|--------------|---------------|-------------------------------|---------------|
|                              |               | Nonavalent HPV | Bivalent HPV | Meningococcal | Nonavalent HPV                | Meningococcal |
| Characteristic               | Category      |                |              |               |                               |               |
|                              | Total         | 496            | 489          | 473           | 325                           | 290           |
| Syphilis                     | Negative      | 496 (100.0%)   | 489 (100.0%) | 471 (99.6%)   | 325 (100.0%)                  | 289 (99.7%)   |
|                              | Positive      | 0              | 0            | 1 (0.2%)      | 0                             | 1 (0.3%)      |
|                              | Not Done      | 0              | 0            | 1 (0.2%)      | 0                             | 0             |
| <i>Chlamydia trachomatis</i> | Negative      | 438 (88.3%)    | 434 (88.8%)  | 413 (87.3%)   | 293 (90.2%)                   | 252 (86.9%)   |
|                              | Positive      | 58 (11.7%)     | 55 (11.2%)   | 60 (12.7%)    | 32 (9.8%)                     | 38 (13.1%)    |
| <i>Neisseria gonorrhoeae</i> | Negative      | 488 (98.4%)    | 480 (98.2%)  | 466 (98.5%)   | 322 (99.1%)                   | 285 (98.3%)   |
|                              | Positive      | 8 (1.6%)       | 9 (1.8%)     | 7 (1.5%)      | 3 (0.9%)                      | 5 (1.7%)      |
| HSV-2                        | Negative      | 407 (82.1%)    | 387 (79.1%)  | 375 (79.3%)   | 264 (81.2%)                   | 226 (77.9%)   |
|                              | Positive      | 88 (17.7%)     | 102 (20.9%)  | 98 (20.7%)    | 60 (18.5%)                    | 64 (22.1%)    |
|                              | Indeterminate | 1 (0.2%)       | 0            | 0             | 1 (0.3%)                      | 0             |
| Bacterial vaginosis*         | Negative      | 415 (83.7%)    | 378 (77.3%)  | 378 (79.9%)   | 278 (85.5%)                   | 239 (82.4%)   |
|                              | Positive      | 81 (16.3%)     | 111 (22.7%)  | 95 (20.1%)    | 47 (14.5%)                    | 51 (17.6%)    |
| <i>Trichomonas vaginalis</i> | Negative      | 477 (96.2%)    | 468 (95.7%)  | 452 (95.6%)   | 315 (96.9%)                   | 275 (94.8%)   |
|                              | Positive      | 19 (3.8%)      | 21 (4.3%)    | 21 (4.4%)     | 10 (3.1%)                     | 15 (5.2%)     |

\*Nugent scores 7-10 were classified as BV positive and Nugent score 0-6 were classified as BV negative.
